# Supplementary material for: Multifunctionalities of near-infrared upconversion luminescence, optical temperature sensing and long persistent luminescence in La3Ga5GeO14:Cr3+,Yb3+,Er3+and their potential coupling
Source: Royal Society of Chemistry journal article supplement (doi:10.1039/c5ra09095d), 2015-01-01
Supplement: c5ra09095d1.pdf [file c5ra09095d1.pdf]

## Supporting information

### **Multifunctionalities of near-infrared upconversion luminescence, optical temperature sensing and long persistent luminescence in $\text{La}_3\text{Ga}_5\text{GeO}_{14}:\text{Cr}^{3+}, \text{Yb}^{3+}, \text{Er}^{3+}$ and their potential coupling**

Xiong Yi, Zitao Chen, Shi Ye <sup>a)</sup>, Ye Li, Enhai Song, Qinyuan Zhang

*State Key Lab of Luminescent Materials and Devices, Guangdong Engineering Technology Research and  
Development Center of Special Optical Fiber Materials and Device, and Guangdong Provincial Key Laboratory  
of Fiber Laser Materials and Applied Techniques, South China University of Technology, Guangzhou 510641,  
China*

---

a) Author to whom correspondence should be addressed; Email: [msyes@scut.edu.cn](mailto:msyes@scut.edu.cn)

To verify thermal stability of this system, UC luminescence spectra of other samples with different  $\text{Cr}^{3+}$  contents at various temperatures were carried out. The results are shown in Fig.S1.

The recovery of UC emission of a typical sample in the heating and cooling process is demonstrated in Fig. S2.

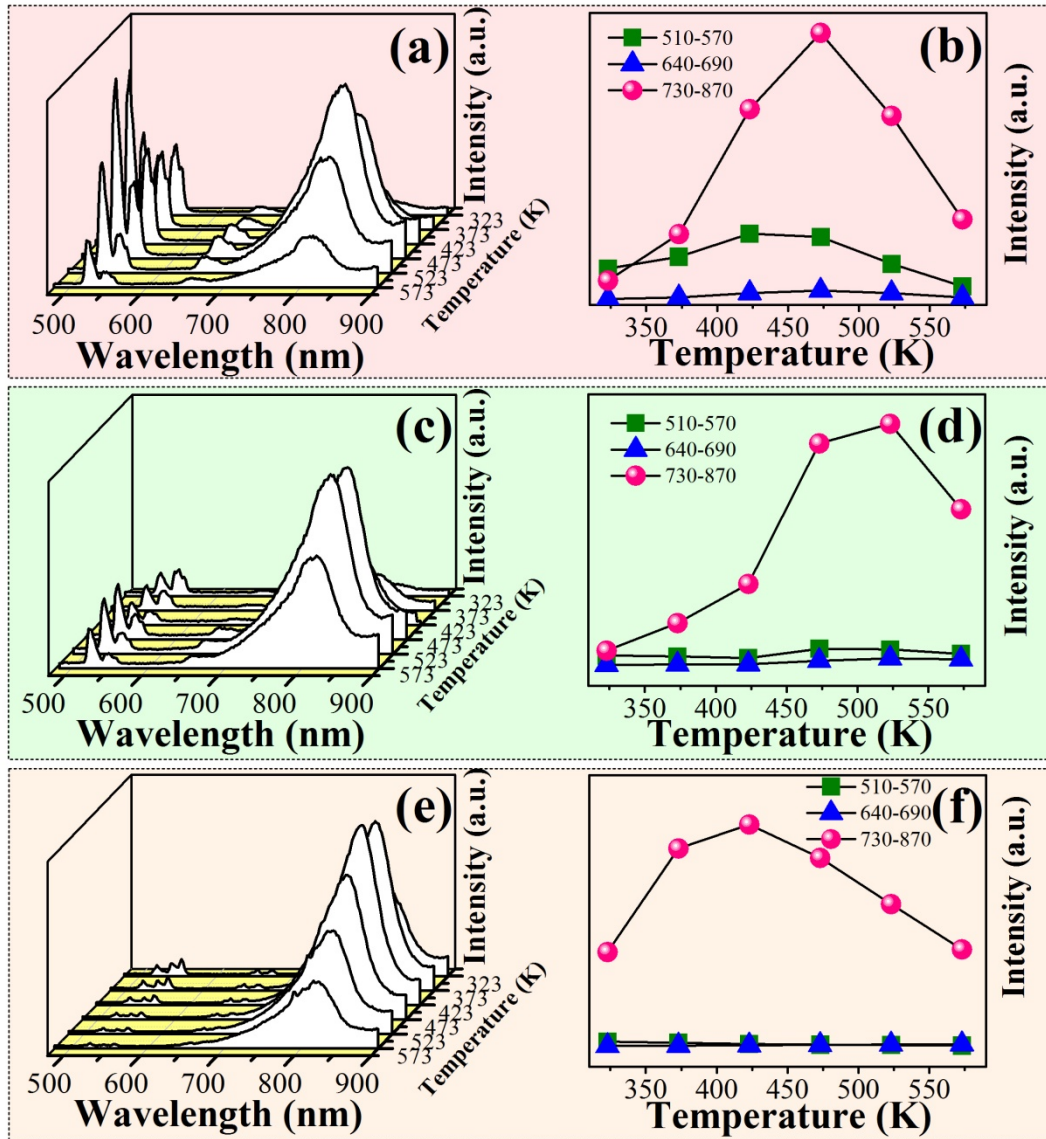

**Fig. S1** UC Luminescence spectra and integrated intensity of LGG:  $x\text{Cr}^{3+}$ ,  $0.12\text{Yb}^{3+}$ ,  $0.06\text{Er}^{3+}$  (for a and b,  $x=0.04$ ; for c and d,  $x=0.1$ ; for e and f,  $x=0.3$ )

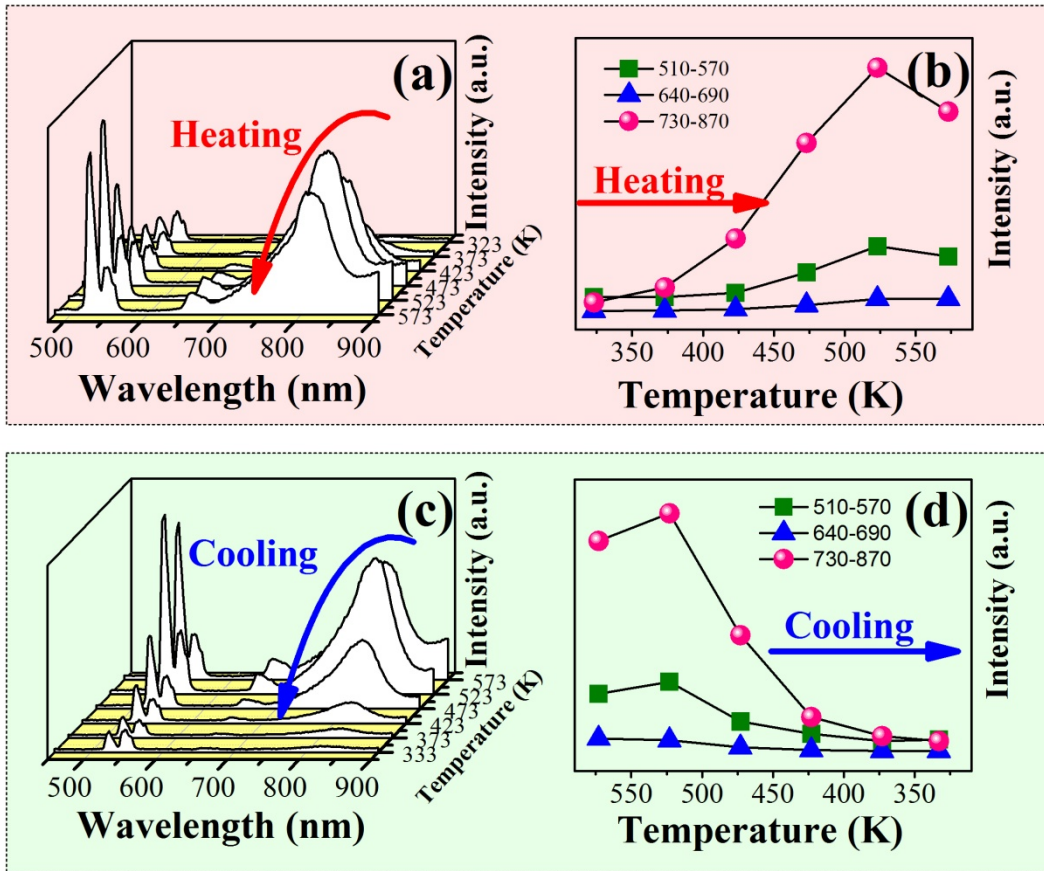

**Fig. S2** Temperature dependent UC emission spectra of LGG: 0.06Cr<sup>3+</sup>, 0.12Yb<sup>3+</sup>, 0.06Er<sup>3+</sup> during heating (a) and cooling (c); (b) and (d) represent the corresponding integrated UC emission intensity of LGG: 0.06Cr<sup>3+</sup>, 0.12Yb<sup>3+</sup>, 0.06Er<sup>3+</sup> at different temperatures during heating and cooling, respectively.
